# Supplementary material
Source: PubMed Central journal article supplement (PMC5052118)

# Uncropped Gels

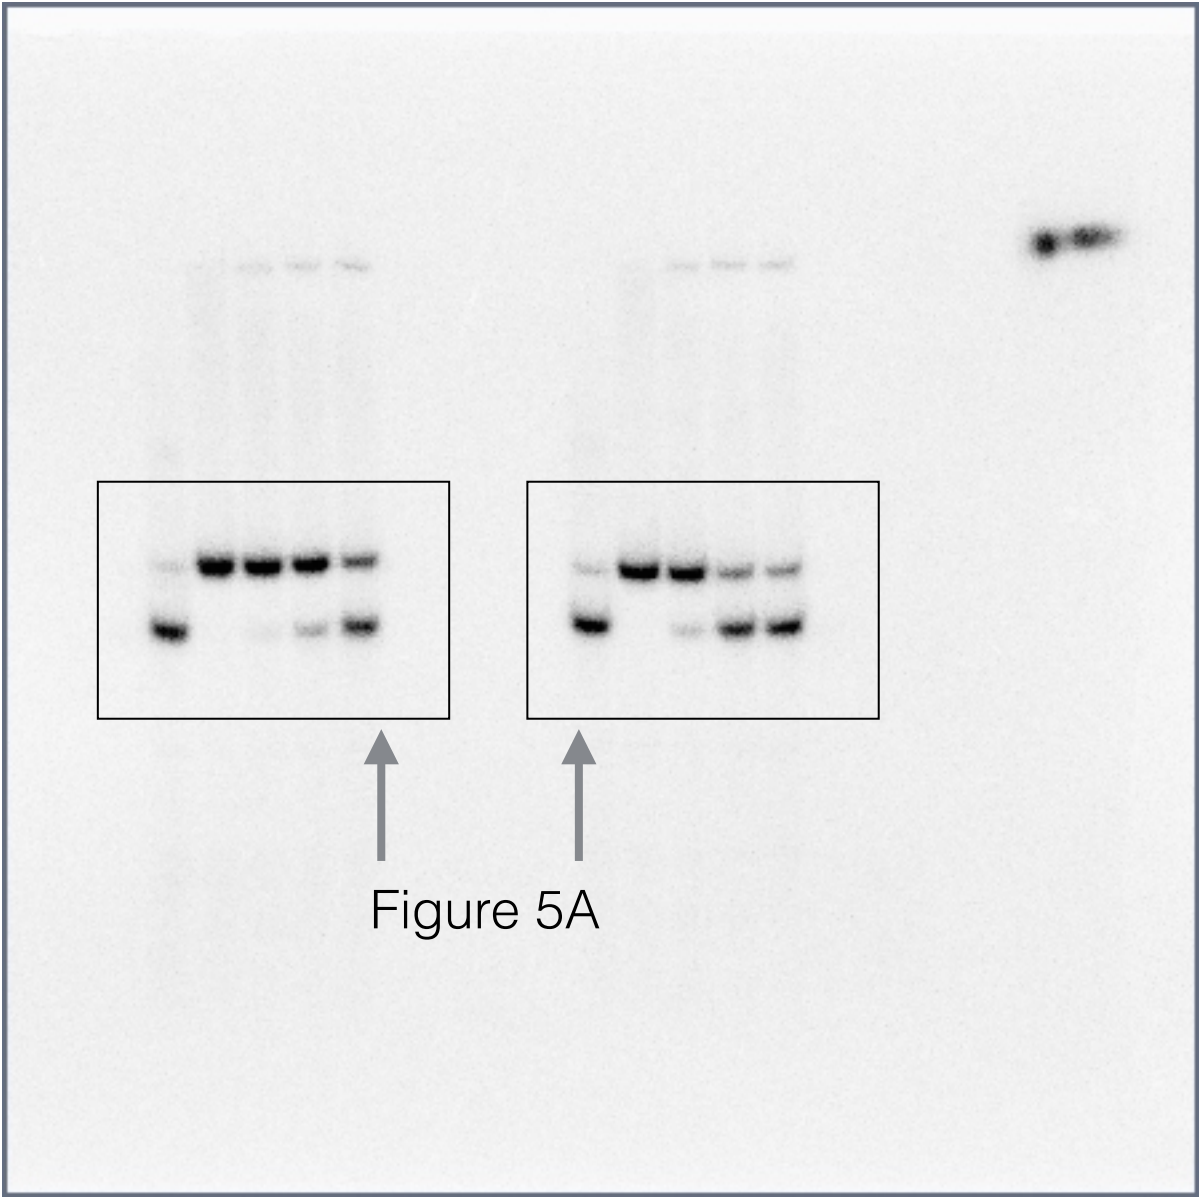

# Uncropped Gels

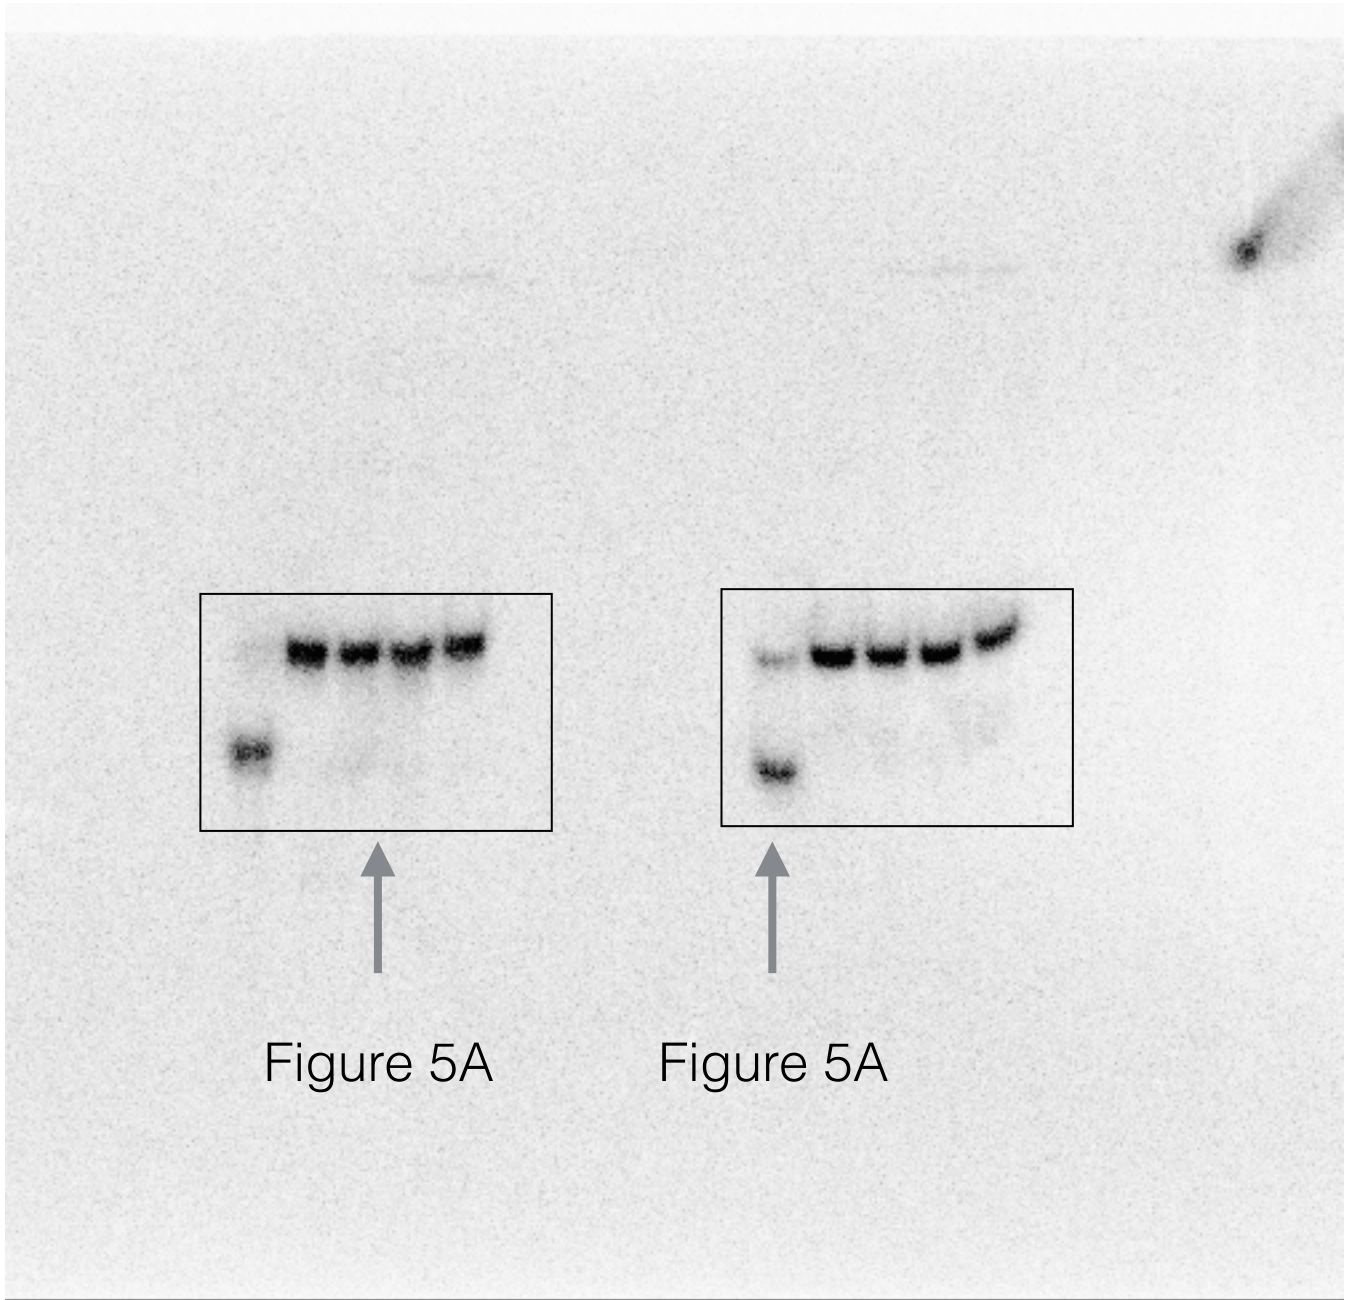

# Uncropped Gels

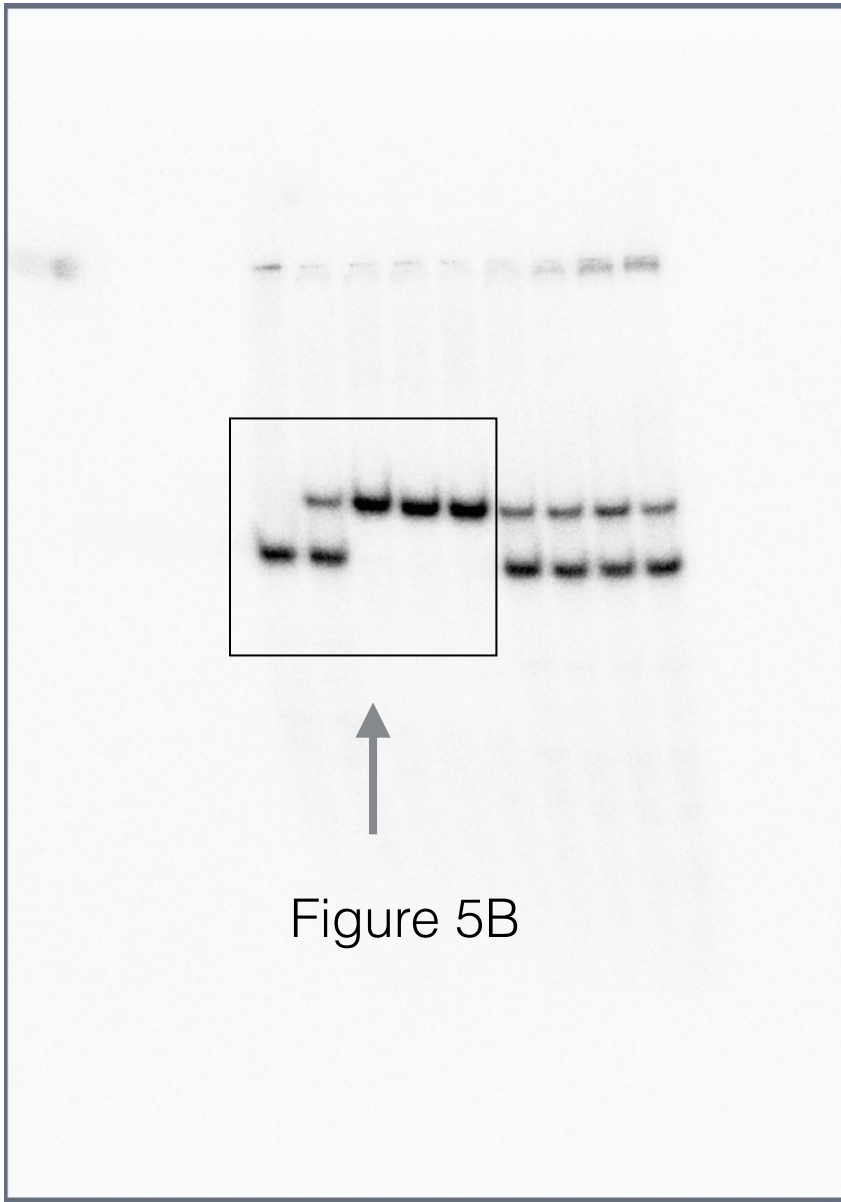

# Uncropped Gels

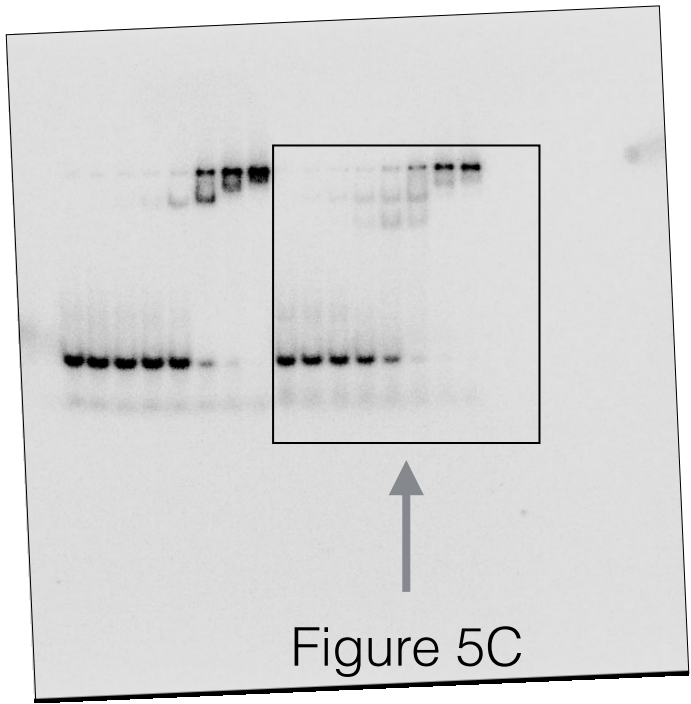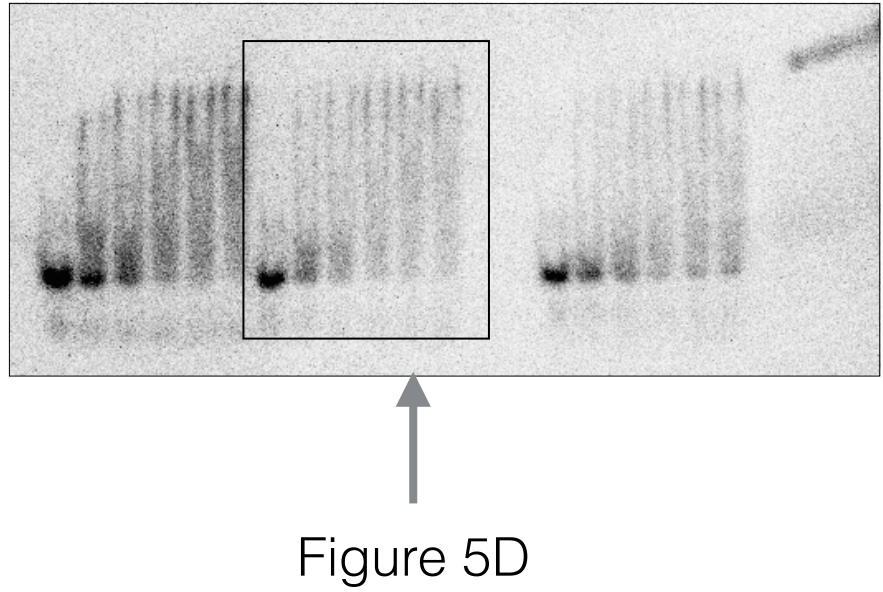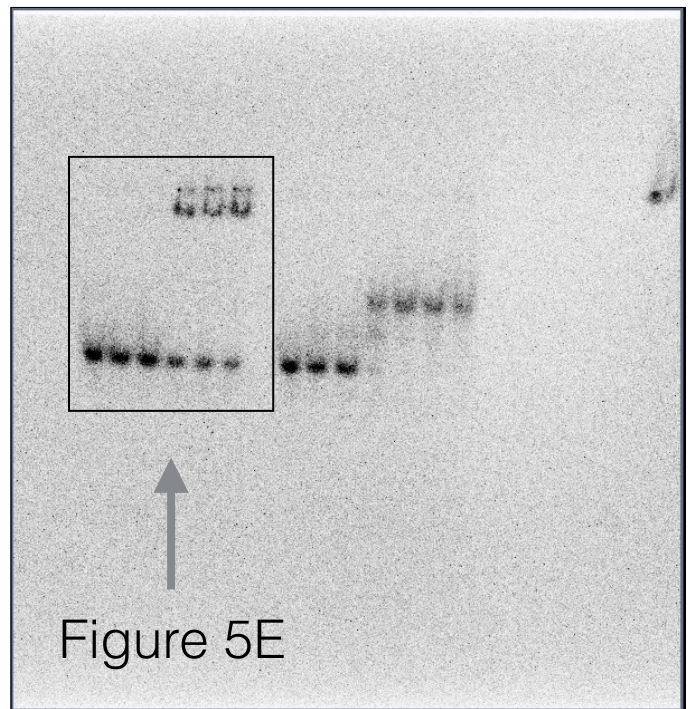

# Uncropped Gels

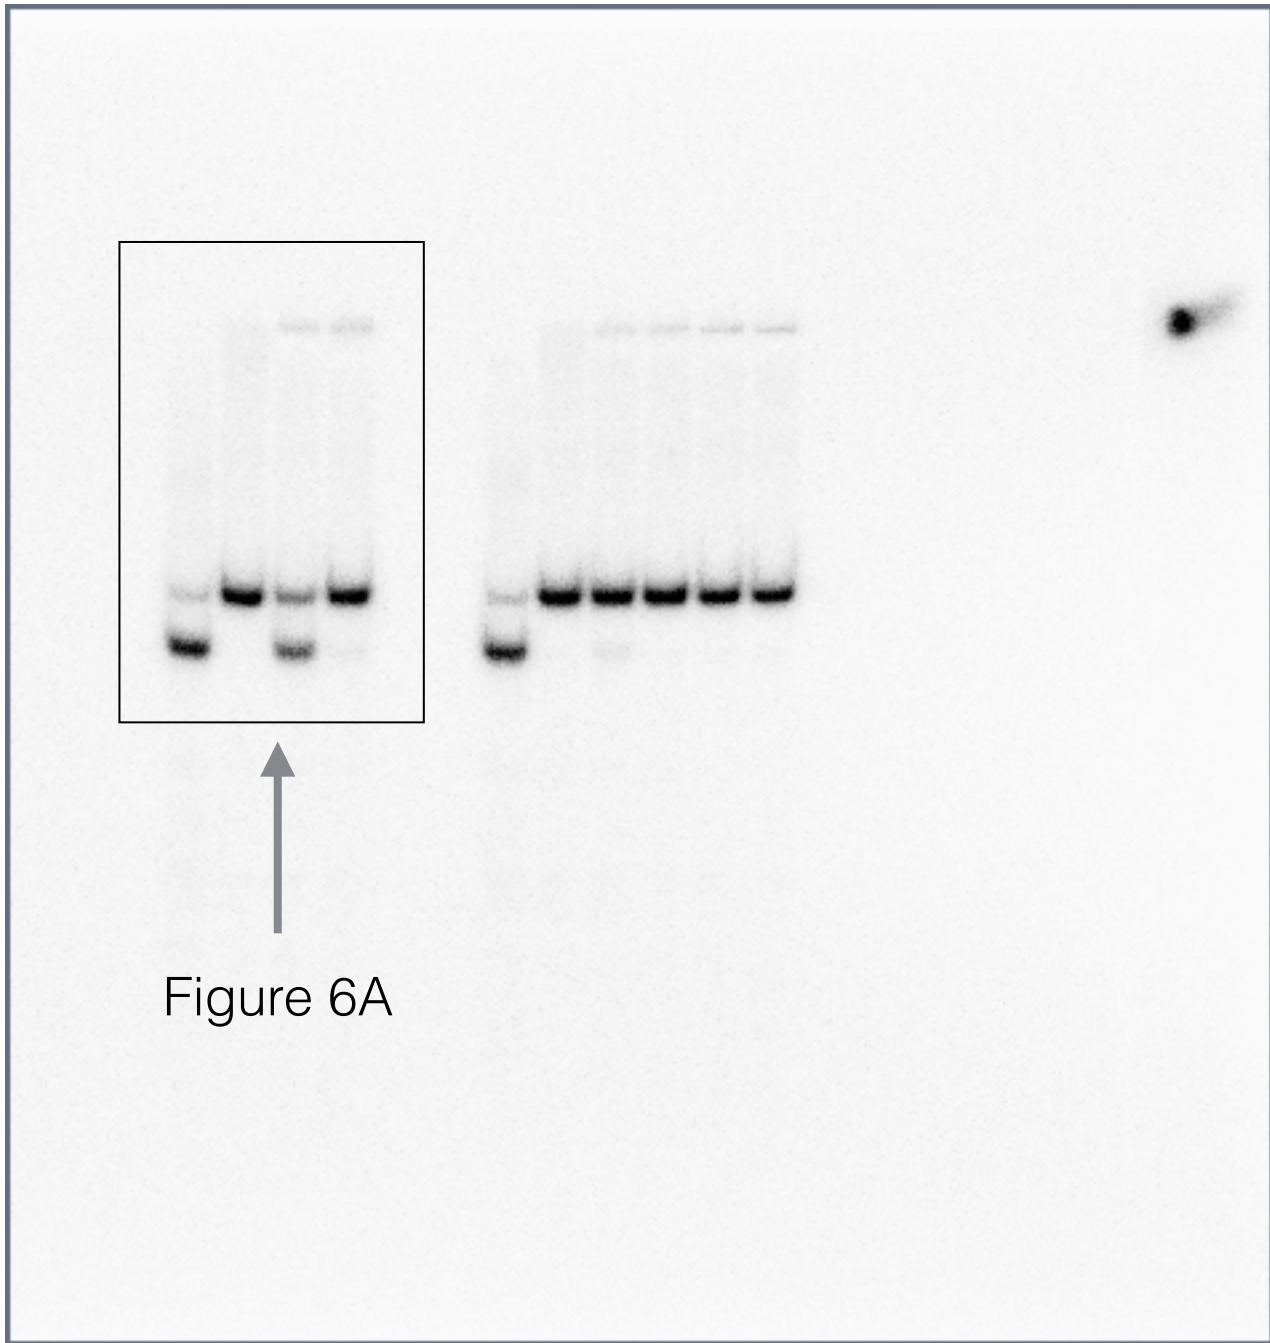

# Uncropped Gels

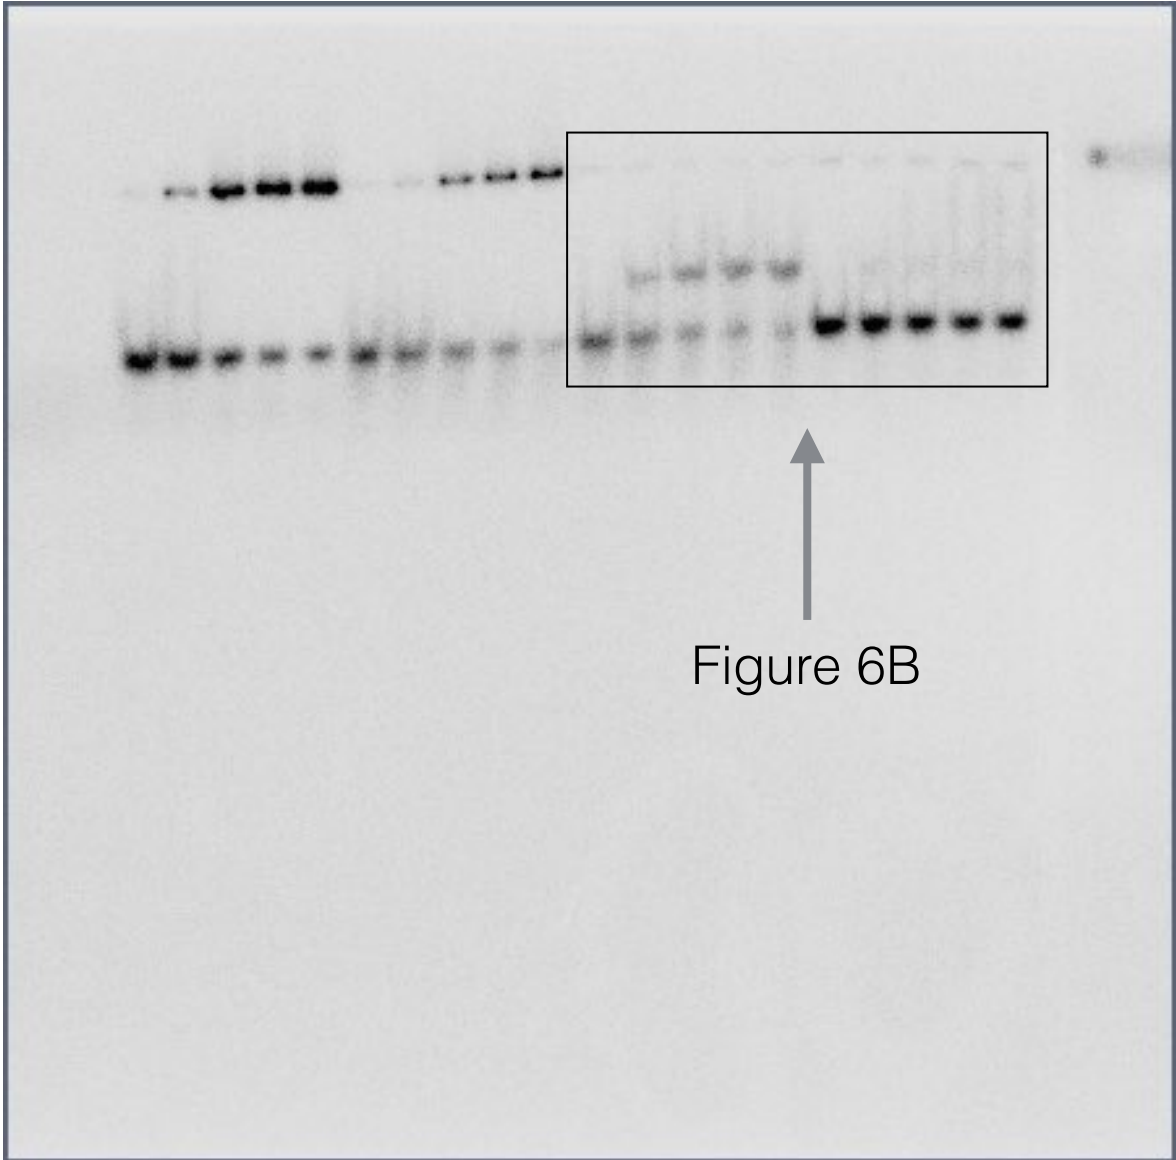

Supplement: NIHMS814431-supplement-supplementary_data_set_1__uncropped_gel_images.pdf [file NIHMS814431-supplement-supplementary_data_set_1__uncropped_gel_images.pdf]
